# Supplementary material for: Improved Formazan Dissolution for Bacterial MTT Assay
Source: PubMed Central journal article supplement (PMC8694201; doi:10.1128/spectrum.01637-21), 2021-12-22
Supplement: spectrum01637-21_supp_1_seq5.pdf [file spectrum01637-21_supp_1_seq5.pdf]

## Supplementary material

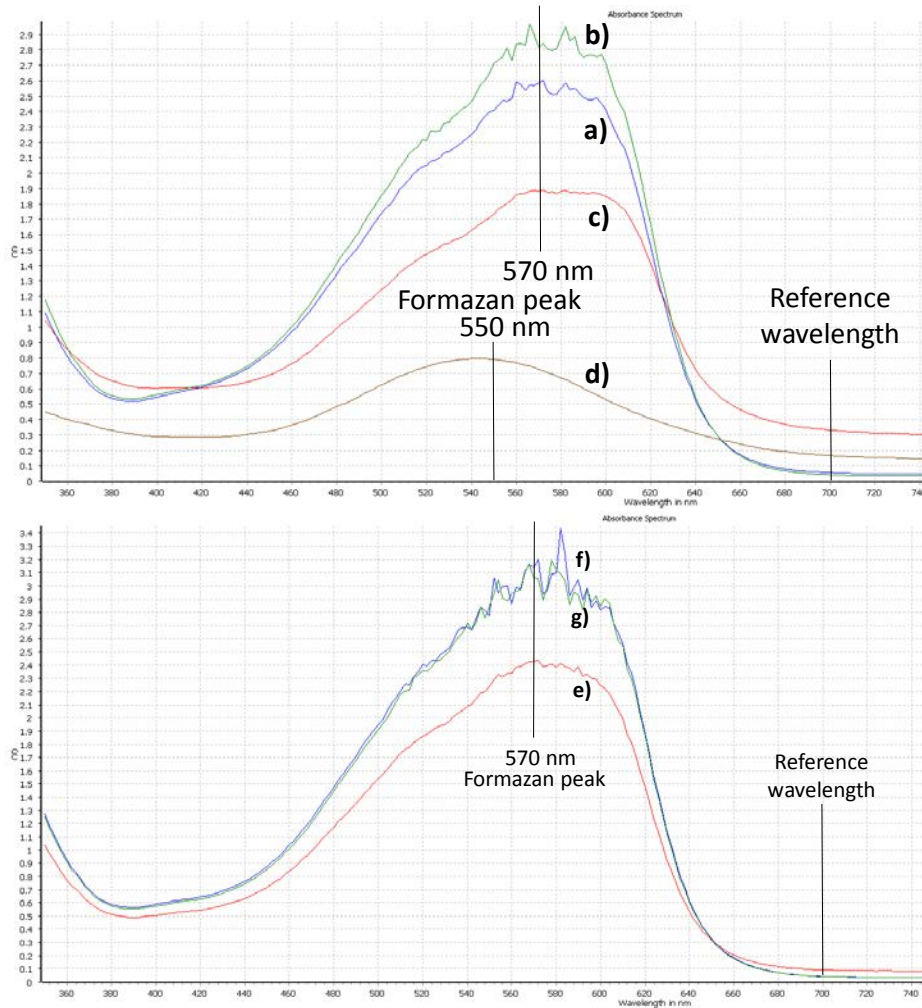

### Suppl. Fig. 1. Absorption spectra of pure formazan dissolved in different solvents

Pure formazan crystals were weighed and dispersed in phosphate-buffered saline. Aliquots were serially diluted under constant stirring, and 100  $\mu$ l portions were added to triplicate wells in a 96-well plate, followed by the addition of 100  $\mu$ l of the tested solvent. Plates were kept on a shaker at 200 rpm. Spectra were recorded 60 minutes after adding the solvents.

a) 10% SDS-buffered DMF; b) 5% SDS-buffered DMF; c) SDS-EDTA; d) ammonia-DMSO; e) 5% SDS-buffered DMSO; f) 10% SDS-buffered DMSO; g) 15% SDS-buffered DMSO

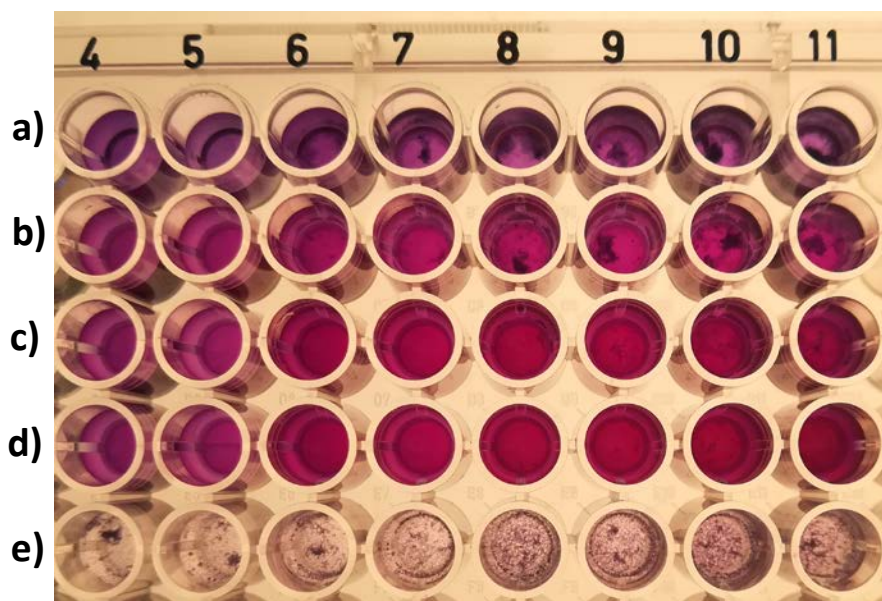

**Suppl. Fig. S2. Image of a 96-well plate taken 60 minutes after the addition of the solvents**  
 Pure formazan was added at the quantities indicated below to a duplicate wells containing 100  $\mu$ l of PBS. Hundred  $\mu$ l of selected solvents were added and the plate was shaken at 200 rpm.  
**Solvents:** a) SDS-EDTA; b) 5% SDS- buffered DMF; c) 7.5% SDS-buffered DMF; d) 10% SDS-buffered DMF; e) ammonia-DMSO  
**Quantity of formazan ( $\mu$ g per well):** wells 4 & 5, 12.5  $\mu$ g; wells 6 & 7, 25.0  $\mu$ g; wells 8 & 9, 37.5  $\mu$ g; wells 10 & 11, 50.0  $\mu$ g

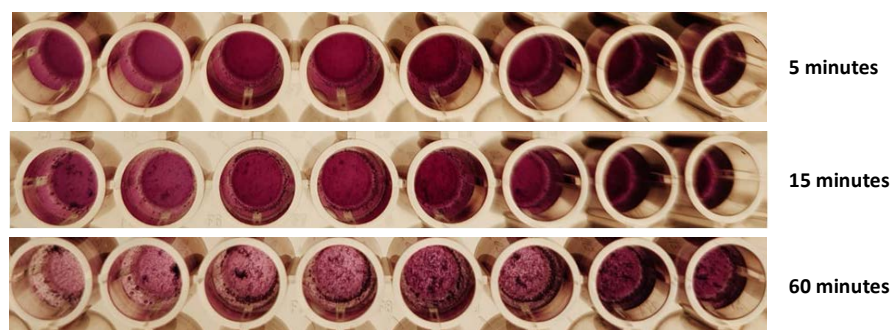

**Suppl. Fig. S3. Time-dependent aggregation of formazan dissolved in ammonia-DMSO**  
 Pure formazan was added at the quantities indicated below to duplicate wells containing 100  $\mu$ l of PBS. Hundred  $\mu$ l of solvents were added and the 96-well plates were shaken at 200 rpm. Images were taken 5, 15, and 60 minutes after adding the solvent.  
**Quantity of formazan added per well:** 12.5  $\mu$ g - wells 1 & 2; 25.0  $\mu$ g - wells 3 & 4; 37.5  $\mu$ g - wells 5 & 6; 50.0  $\mu$ g - wells 7 & 8.

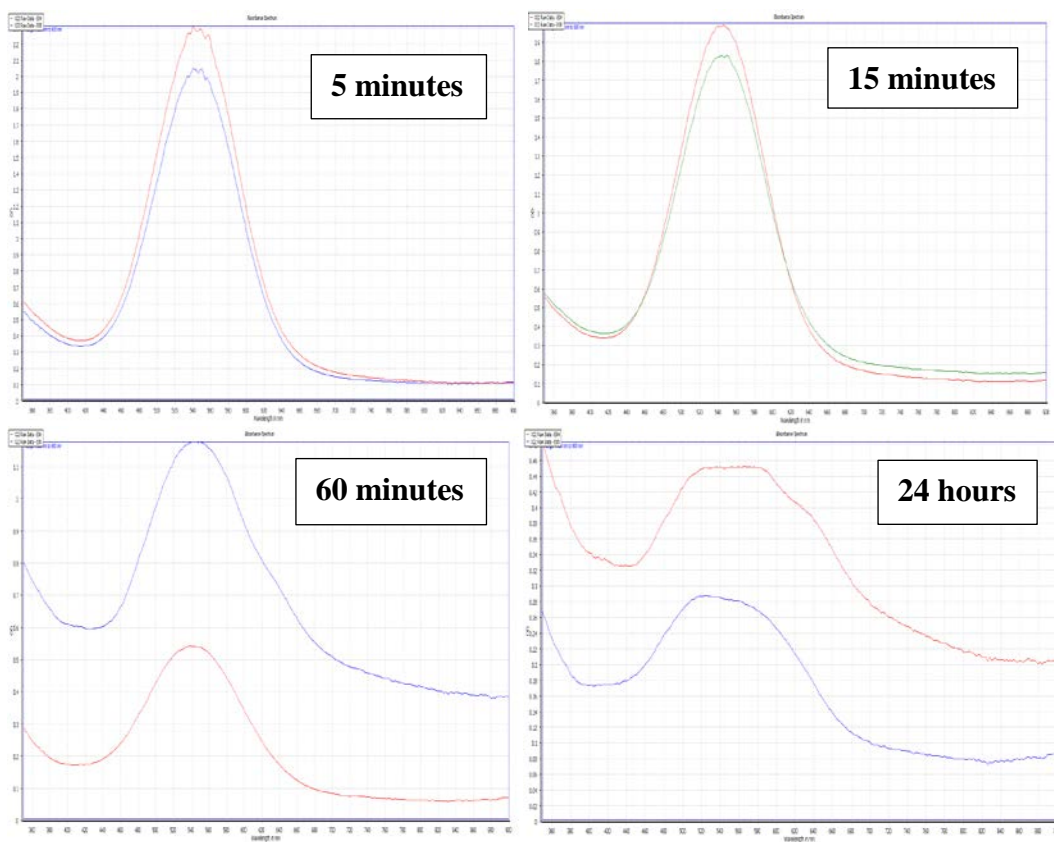

**Suppl. Fig. S4. Time-dependent changes of the absorption spectrum of formazan dissolved in ammonia-DMSO**

Spectra of duplicate wells were recorded 5, 15, 60 minutes, and 24 hours after adding ammonia-DMSO to wells containing 12.5  $\mu\text{g}$  formazan in 100  $\mu\text{l}$  PBS.



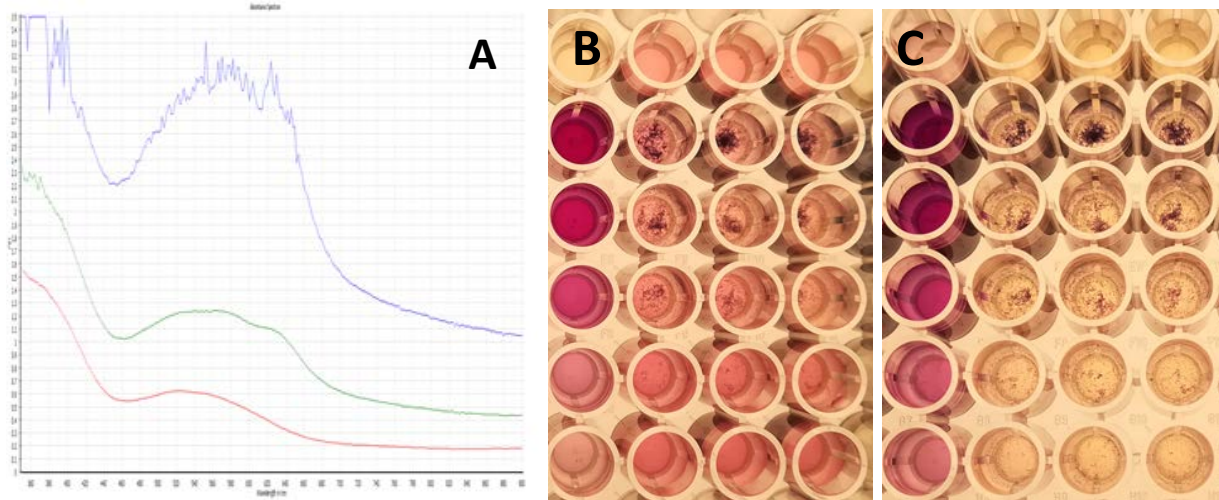

**Suppl. Fig S5. Absorbance spectra of triplicate wells recorded 1 hour after the addition of ammonia-DMSO to wells containing  $18 \times 10^8$  *E. coli* cells/ml subjected to the MTT assay (A). Images of a 96-well plate taken 1 hour (B) and 24 hours (C) after adding ammonia-DMSO. Wells contained medium (top row) or *E. coli* in the range  $0.8 \times 10^8$  –  $18 \times 10^8$  cells/ml. Ammonia-DMSO was added to solubilize formazan crystals after 30 min. of incubation with MTT solution.**

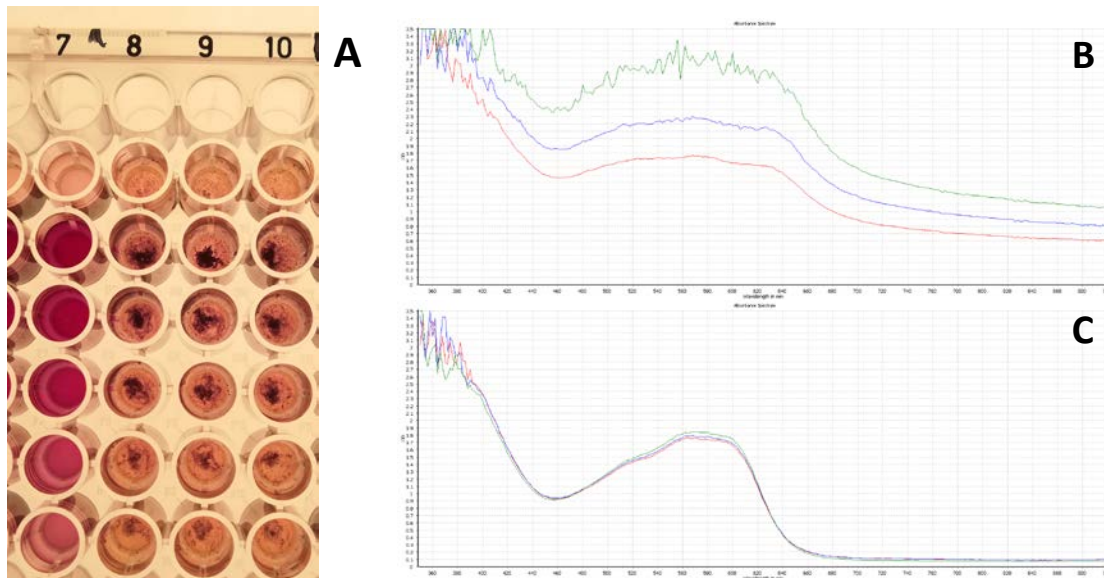

**Suppl. Fig S6. Image of a 96-well plate (A) and absorbance spectra of triplicate wells B & C).**

**A)** Wells containing 100  $\mu$ l of BHI medium (top row) or 100  $\mu$ l of *S. aureus* culture ( $1.5 - 57 \times 10^8$  cells/ml) were subjected to the MTT assay. Formazan was solubilized with ammonia-DMSO. The image was captured 2 hours after addition of the solvent.

**B)** Absorption spectra of triplicate wells containing  $8 \times 10^8$  *S. aureus* cells/ml subjected to the MTT assay and solubilized with ammonia-DMSO. Spectra were recorded 2 hours after the addition of the solvent.

C) Absorption spectra of triplicate wells containing  $8 \times 10^8$  cells/ml, 2 hours after addition of 5% SDS-buffered DMSO. All other conditions were as in Panel B.

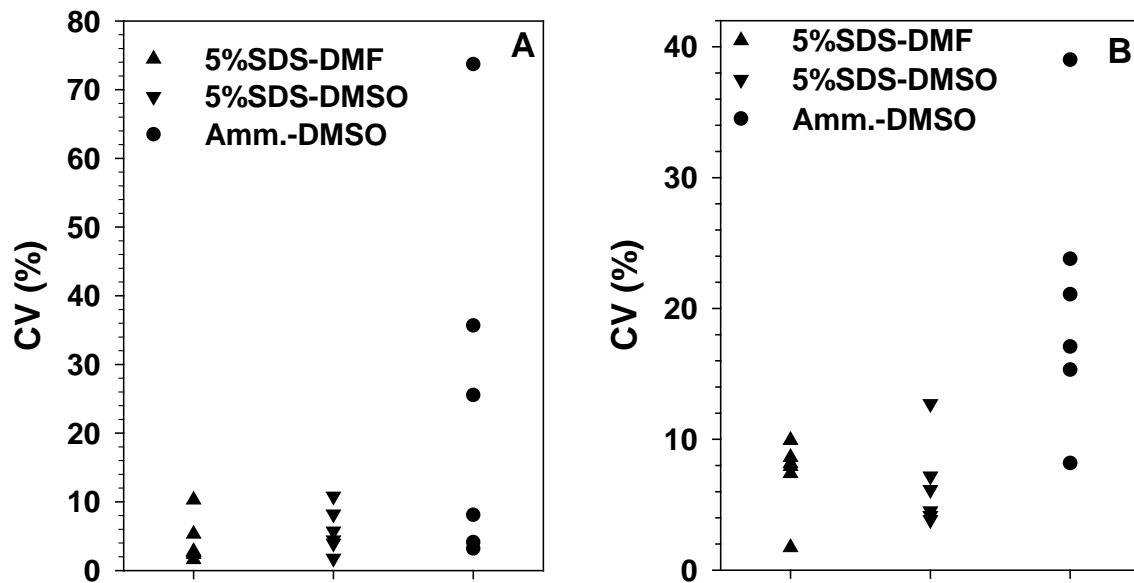

Suppl. Fig S7. Inter assay coefficient of variation (CV).  
Panel A: *E. coli*; Panel B: *S. aureus*

| <i>E. coli</i>                                              | R <sup>2</sup> | p      |
|-------------------------------------------------------------|----------------|--------|
| 5% SDS-DMF                                                  | 0.992          | <0.001 |
| 5% SDS-DMSO                                                 | 0.991          | <0.001 |
| Ammonia-DMSO                                                | 0.788          | 0.018  |
| <b><i>S. aureus</i> (up to 5.7x10<sup>9</sup> cells/ml)</b> |                |        |
| 5% SDS-DMF                                                  | 0.769          | 0.022  |
| 5% SDS-DMSO                                                 | 0.841          | 0.010  |
| Ammonia-DMSO                                                | 0.288          | 0.272  |
| <b><i>S. aureus</i> (up to 5.7x10<sup>9</sup> cells/ml)</b> |                |        |
| 5% SDS-DMF                                                  | 0.979          | 0.010  |
| 5% SDS-DMSO                                                 | 0.990          | 0.005  |
| Ammonia-DMSO                                                | 0.921          | 0.040  |

**Suppl. Table 1. Coefficient of determination (R<sup>2</sup>) and p values obtained by linear regression analysis for *E. coli* and *S. aureus* cultures subjected to the MTT assay and solubilized with the listed solvents.**

Data were derived from Figs. 3 D and 4 D. For *S. aureus*, R<sup>2</sup> and p values were calculated for the entire range of cell densities (0 - 5.7x10<sup>9</sup> cells/ml) and for the linear part of the graph (0 – 8x10<sup>8</sup> cells/ml)
